# Supplementary material for: Sterols from the Octocoral Nephthea columnaris
Source: MDPI journal article supplement (doi:10.3390/md15070212), 2017-07-04
Supplement: s1 [file s1]

## Supporting Information

| No   | Content                                                                                          | page |
|------|--------------------------------------------------------------------------------------------------|------|
| S01. | HRESIMS spectrum of compound <b>1</b> .                                                          | 2    |
| S02. | <sup>1</sup> H NMR spectrum (400 MHz) of compound <b>1</b> in CDCl <sub>3</sub> .                | 2    |
| S03. | <sup>13</sup> C NMR spectrum (100 MHz) of compound <b>1</b> in CDCl <sub>3</sub> .               | 3    |
| S04. | <sup>13</sup> C NMR (0–40 ppm) spectrum (100 MHz) of compound <b>1</b> in CDCl <sub>3</sub> .    | 3    |
| S05. | <sup>13</sup> C NMR (40–80 ppm)spectrum (100 MHz) of compound <b>1</b> in CDCl <sub>3</sub> .    | 4    |
| S06. | <sup>13</sup> C NMR (100–160 ppm) spectrum (100 MHz) of compound <b>1</b> in CDCl <sub>3</sub> . | 4    |
| S07. | DEPT spectrum of compound <b>1</b> in CDCl <sub>3</sub> .                                        | 5    |
| S08. | DEPT (0–40 ppm) spectrum of compound <b>1</b> in CDCl <sub>3</sub> .                             | 5    |
| S09. | DEPT (40–80 ppm) spectrum of compound <b>1</b> in CDCl <sub>3</sub> .                            | 6    |
| S10. | DEPT (100–160 ppm) spectrum of compound <b>1</b> in CDCl <sub>3</sub> .                          | 6    |
| S11. | gHSQC spectrum of compound <b>1</b> in CDCl <sub>3</sub> .                                       | 7    |
| S12. | <sup>1</sup> H– <sup>1</sup> H COSY spectrum of compound <b>1</b> in CDCl <sub>3</sub> .         | 7    |
| S13. | gHMBC spectrum of compound <b>1</b> in CDCl <sub>3</sub> .                                       | 8    |
| S14. | NOESY spectrum of compound <b>1</b> in CDCl <sub>3</sub> .                                       | 8    |
| S15. | HRESIMS spectrum of compound <b>2</b> .                                                          | 9    |
| S16. | <sup>1</sup> H NMR spectrum (400 MHz) of compound <b>2</b> in CDCl <sub>3</sub> .                | 9    |
| S17. | <sup>13</sup> C NMR spectrum (100 MHz) of compound <b>2</b> in CDCl <sub>3</sub> .               | 10   |
| S18. | <sup>13</sup> C NMR (15–40 ppm) spectrum (100 MHz) of compound <b>2</b> in CDCl <sub>3</sub> .   | 10   |
| S19. | <sup>13</sup> C NMR (40–80 ppm) spectrum (100 MHz) of compound <b>2</b> in CDCl <sub>3</sub> .   | 11   |
| S20. | <sup>13</sup> C NMR (100–160 ppm) spectrum (100 MHz) of compound <b>2</b> in CDCl <sub>3</sub> . | 11   |
| S21. | DEPT spectrum of compound <b>2</b> in CDCl <sub>3</sub> .                                        | 12   |
| S22. | DEPT (15–40 ppm) spectrum of compound <b>2</b> in CDCl <sub>3</sub> .                            | 12   |
| S23. | DEPT (40–80 ppm) spectrum of compound <b>2</b> in CDCl <sub>3</sub> .                            | 13   |
| S24. | DEPT (100–160 ppm) spectrum of compound <b>2</b> in CDCl <sub>3</sub> .                          | 13   |
| S25. | gHSQC spectrum of compound <b>2</b> in CDCl <sub>3</sub> .                                       | 14   |
| S26. | <sup>1</sup> H– <sup>1</sup> H COSY spectrum of compound <b>2</b> in CDCl <sub>3</sub> .         | 14   |
| S27. | gHMBC spectrum of compound <b>2</b> in CDCl <sub>3</sub> .                                       | 15   |
| S28. | NOESY spectrum of compound <b>2</b> in CDCl <sub>3</sub> .                                       | 15   |

## Mass Spectrum SmartFormula Report

### Analysis Info

Analysis Name D:\Data\2\nef75533\_000019.d  
Method broadband first signal  
Sample Name Nef-7-5-5-3-3  
Comment ESI Positive

12/6/2016 3:47:07 PM  
Operator: YU HSIAO-CHING  
Instrument: BRUKER FT-MS solariX

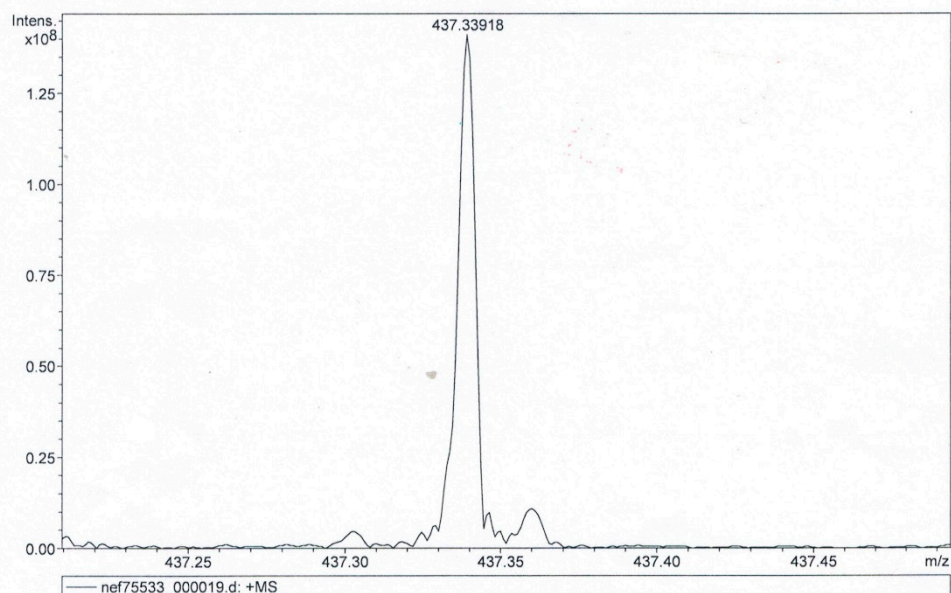

| Meas. m/z | # | Formula          | Score  | m/z       | err [mDa] | err [ppm] | mSigma | rdb | e <sup>-</sup> | Conf | N-Rule |
|-----------|---|------------------|--------|-----------|-----------|-----------|--------|-----|----------------|------|--------|
| 437.33918 | 1 | C 28 H 46 Na O 2 | 100.00 | 437.33900 | -0.18     | -0.42     | 8.0    | 5.5 | even           |      | ok     |

### S01. HRESIMS spectrum of compound 1.

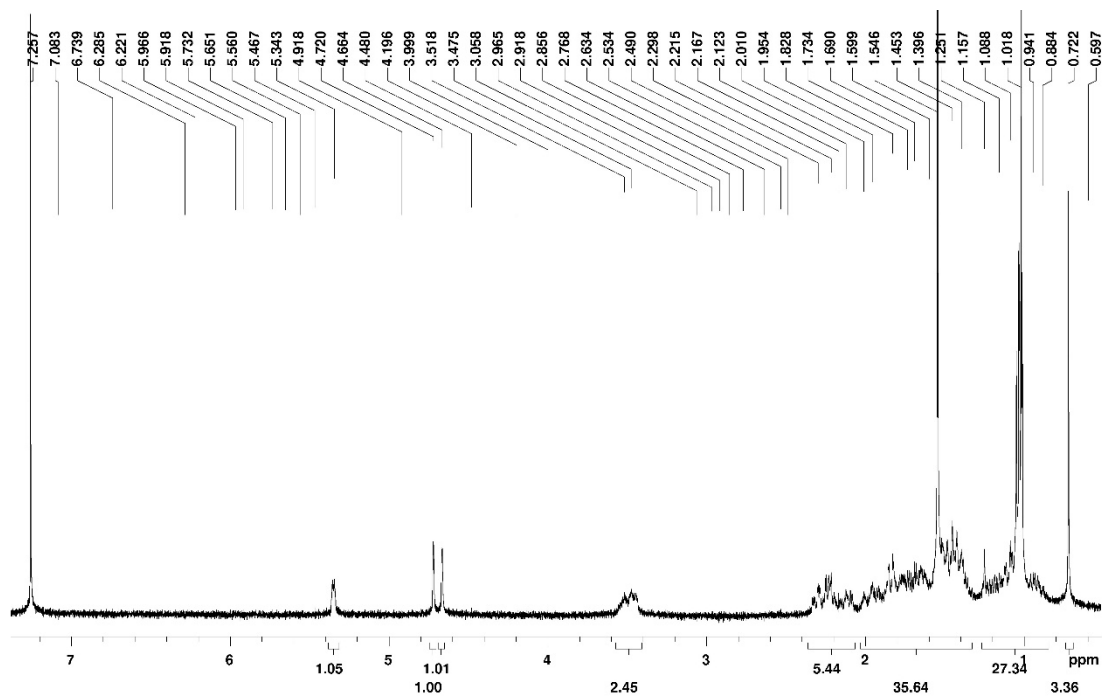

### S02. <sup>1</sup>H NMR spectrum (400 MHz) of compound 1 in CDCl<sub>3</sub>.

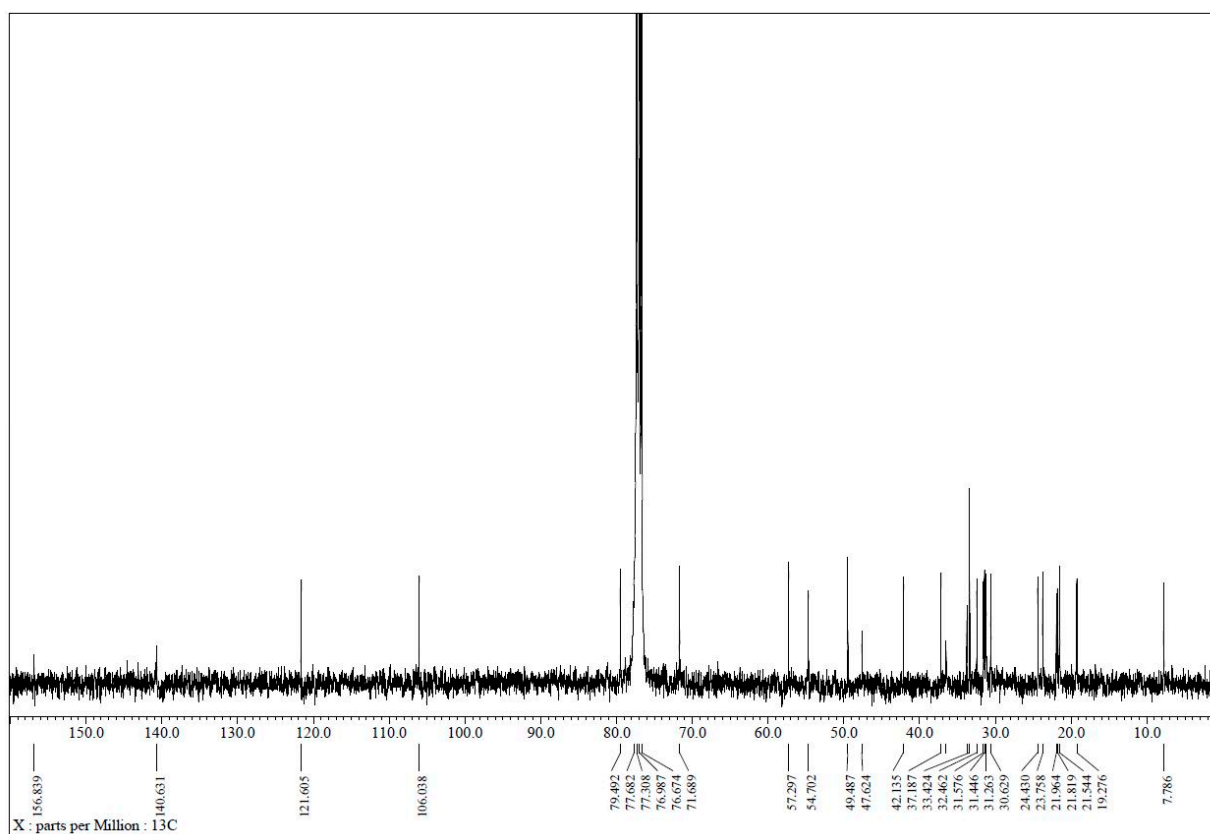

S03.  $^{13}\text{C}$  NMR spectrum (100 MHz) of compound **1** in  $\text{CDCl}_3$ .

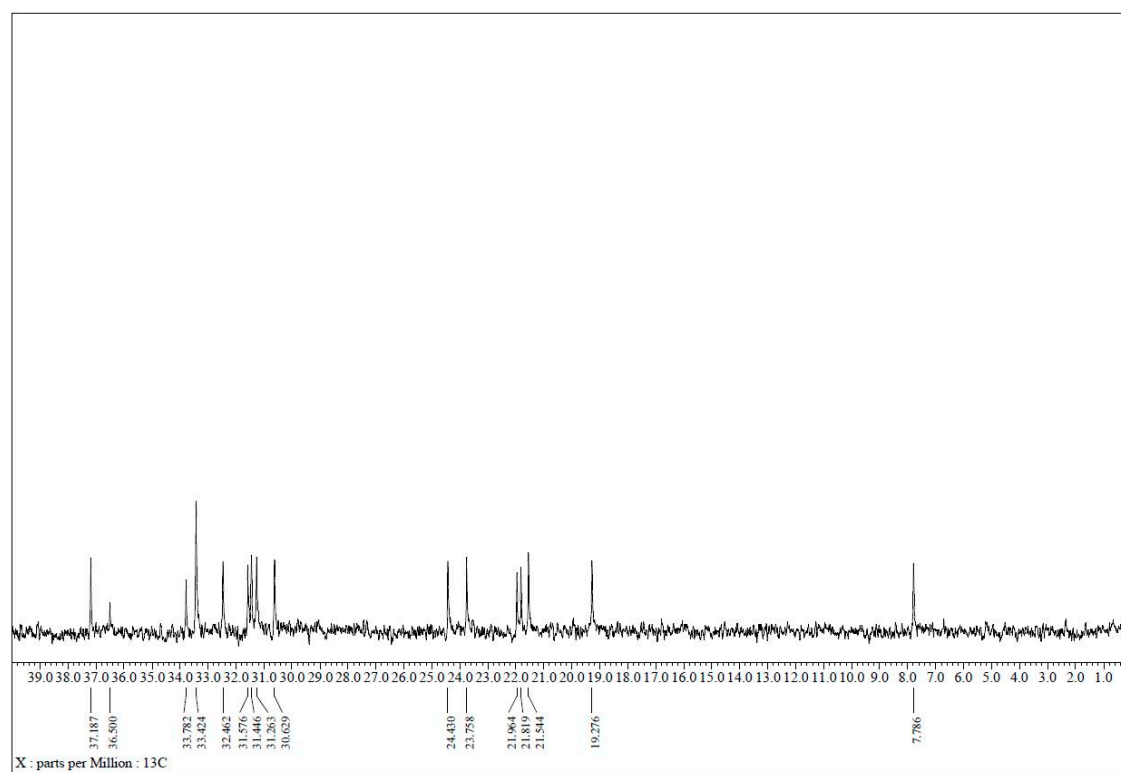

S04.  $^{13}\text{C}$  NMR (0–40 ppm) spectrum (100 MHz) of compound **1** in  $\text{CDCl}_3$ .

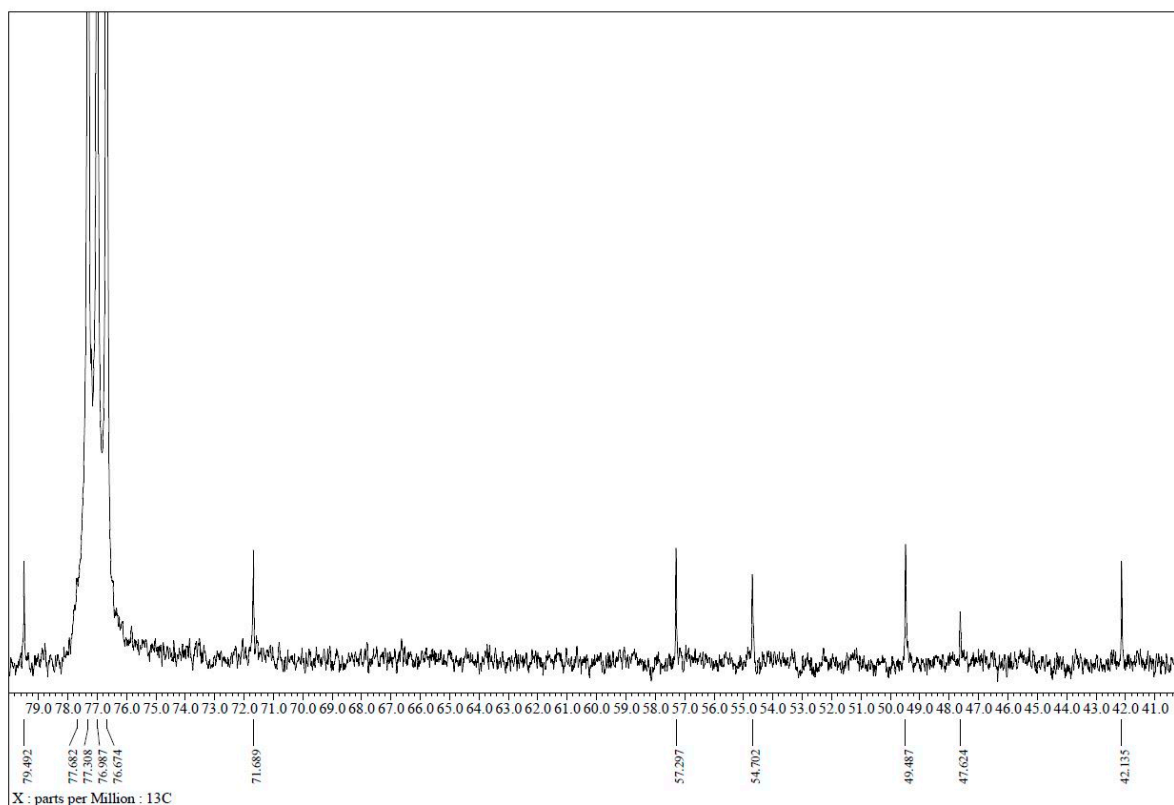

S05.  $^{13}\text{C}$  NMR (40–80 ppm) spectrum (100 MHz) of compound **1** in  $\text{CDCl}_3$ .

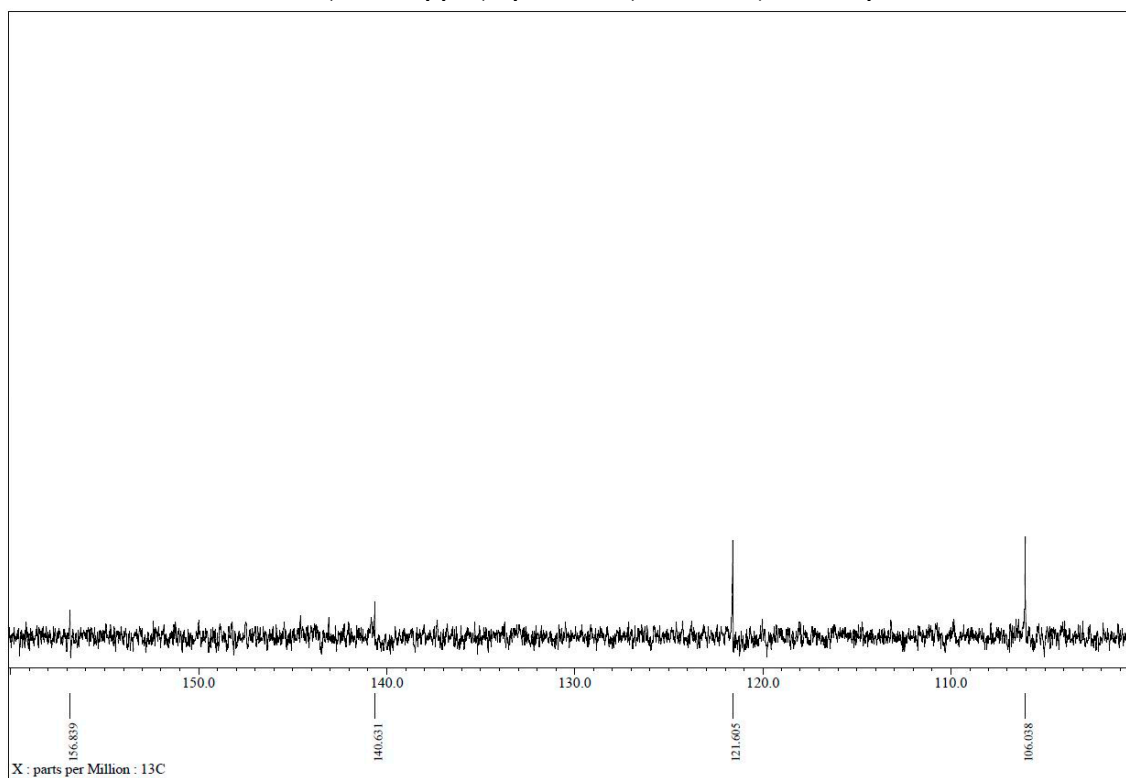

S06.  $^{13}\text{C}$  NMR (100–160 ppm) spectrum (100 MHz) of compound **1** in  $\text{CDCl}_3$ .

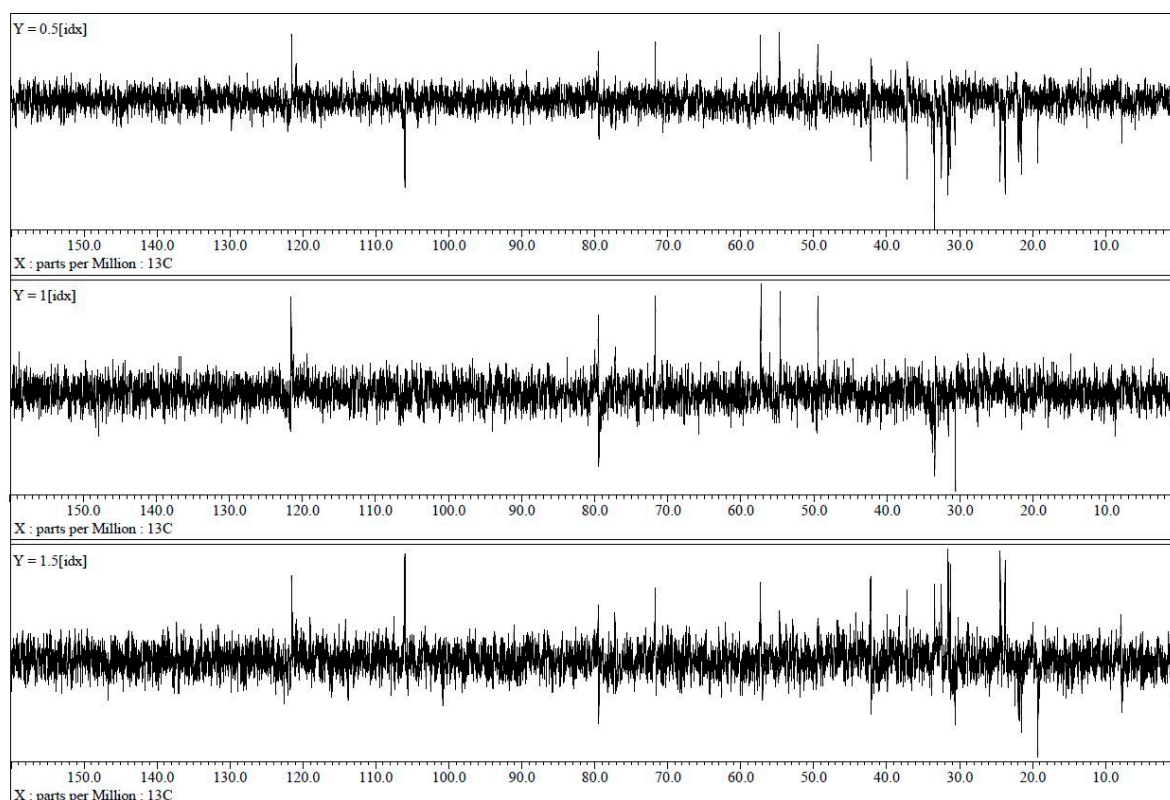

S07. DEPT spectrum of compound **1** in  $\text{CDCl}_3$ .

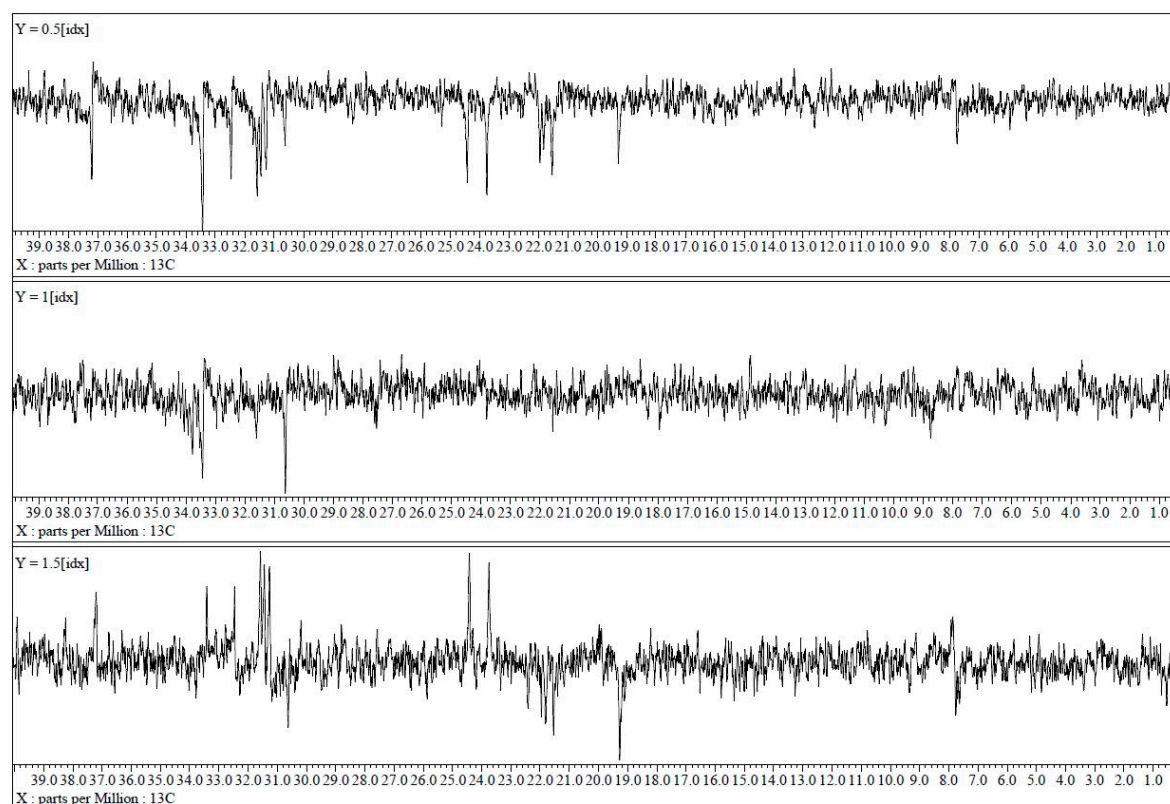

S08. DEPT (0–40 ppm) spectrum of compound **1** in  $\text{CDCl}_3$ .

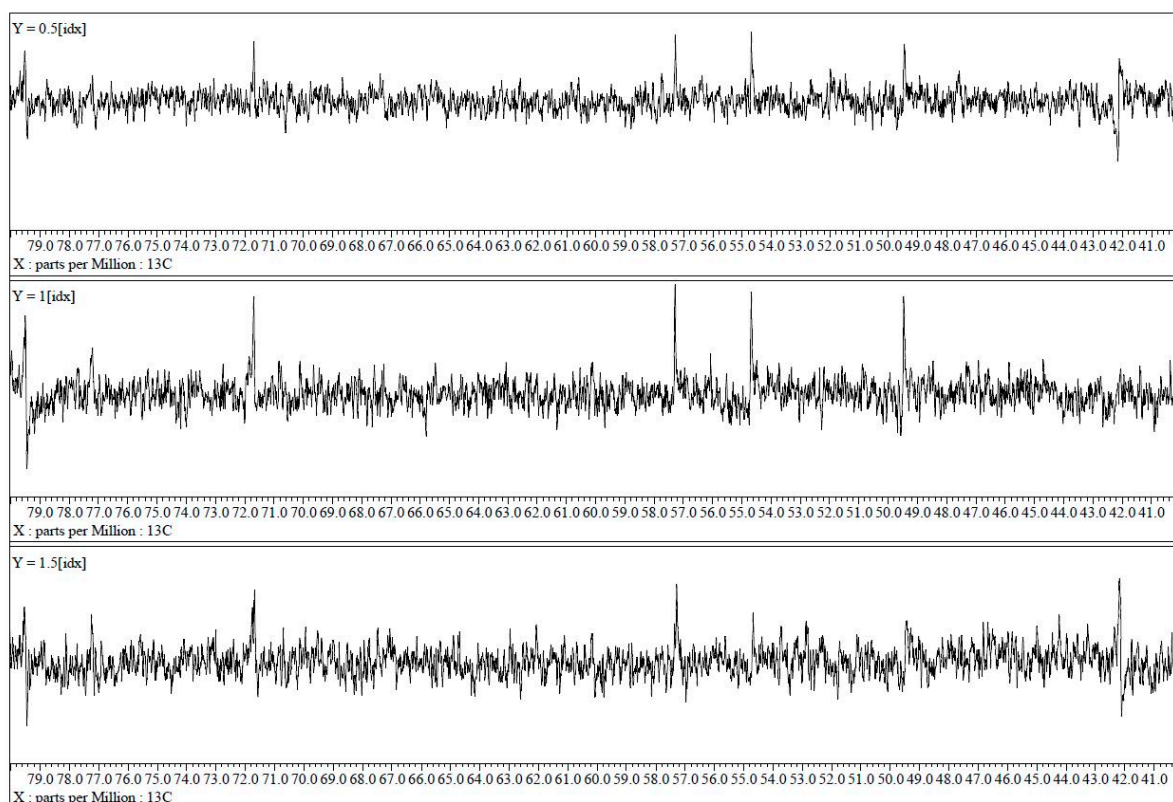

S09. DEPT (40–80 ppm) spectrum of compound **1** in  $\text{CDCl}_3$ .

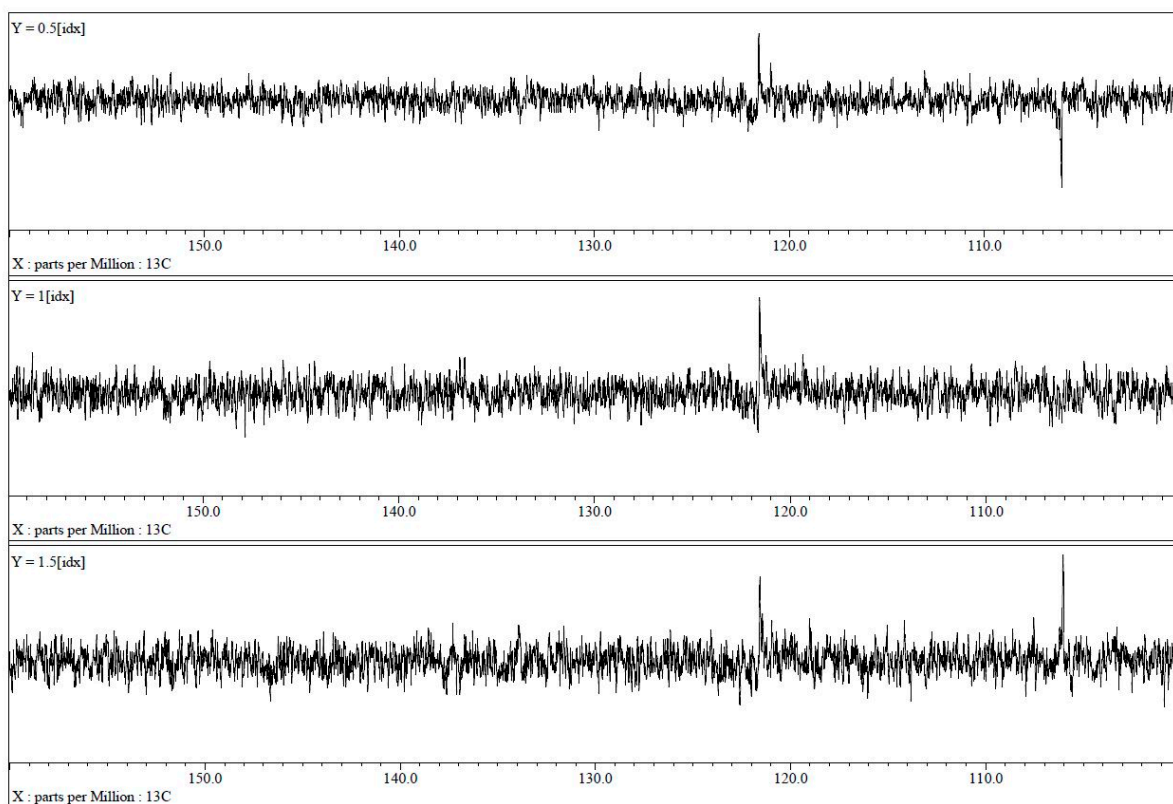

S10. DEPT (100–160 ppm) spectrum of compound **1** in  $\text{CDCl}_3$ .



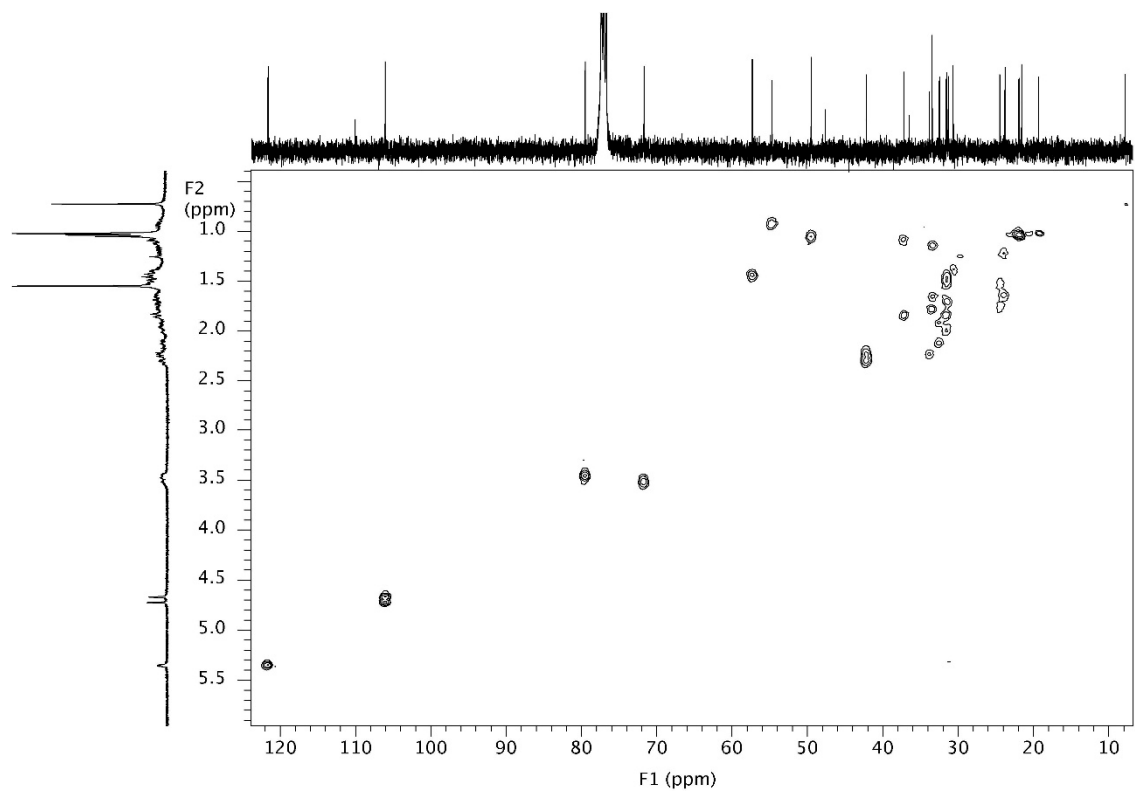

S11. gHSQC spectrum of compound **1** in CDCl<sub>3</sub>.

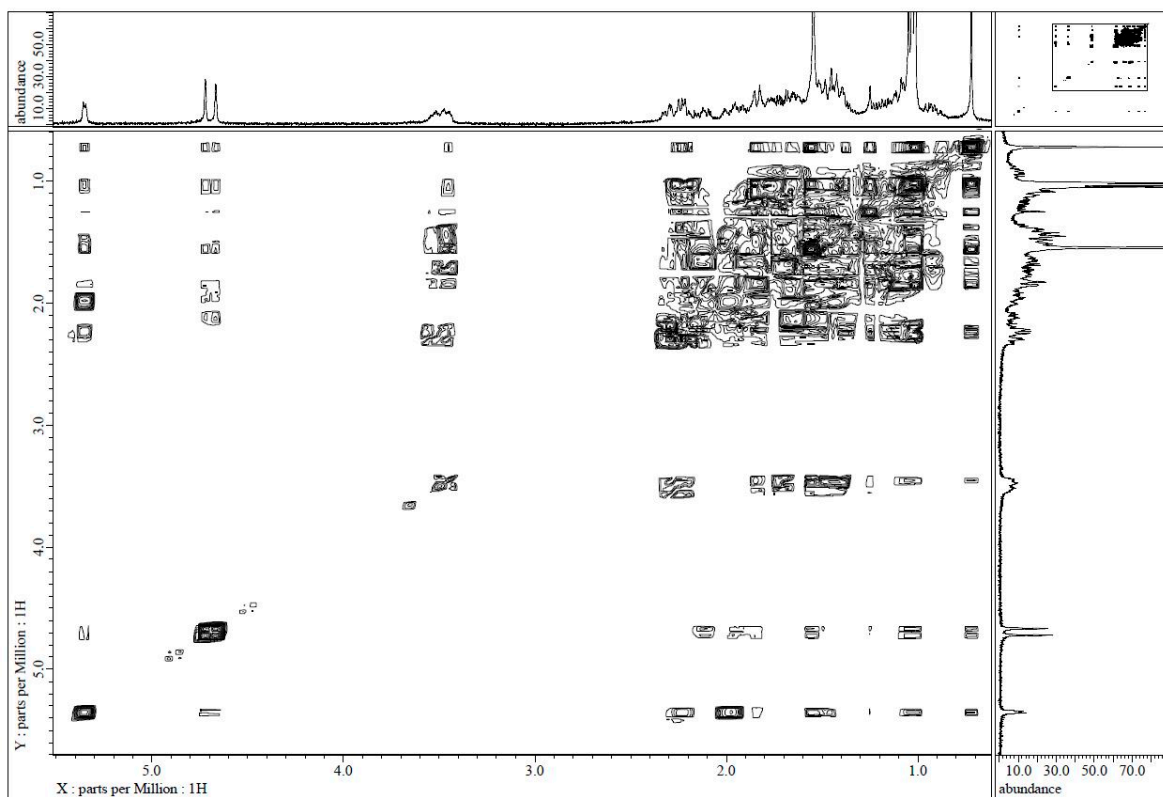

S12. <sup>1</sup>H–<sup>1</sup>H COSY spectrum of compound **1** in CDCl<sub>3</sub>.

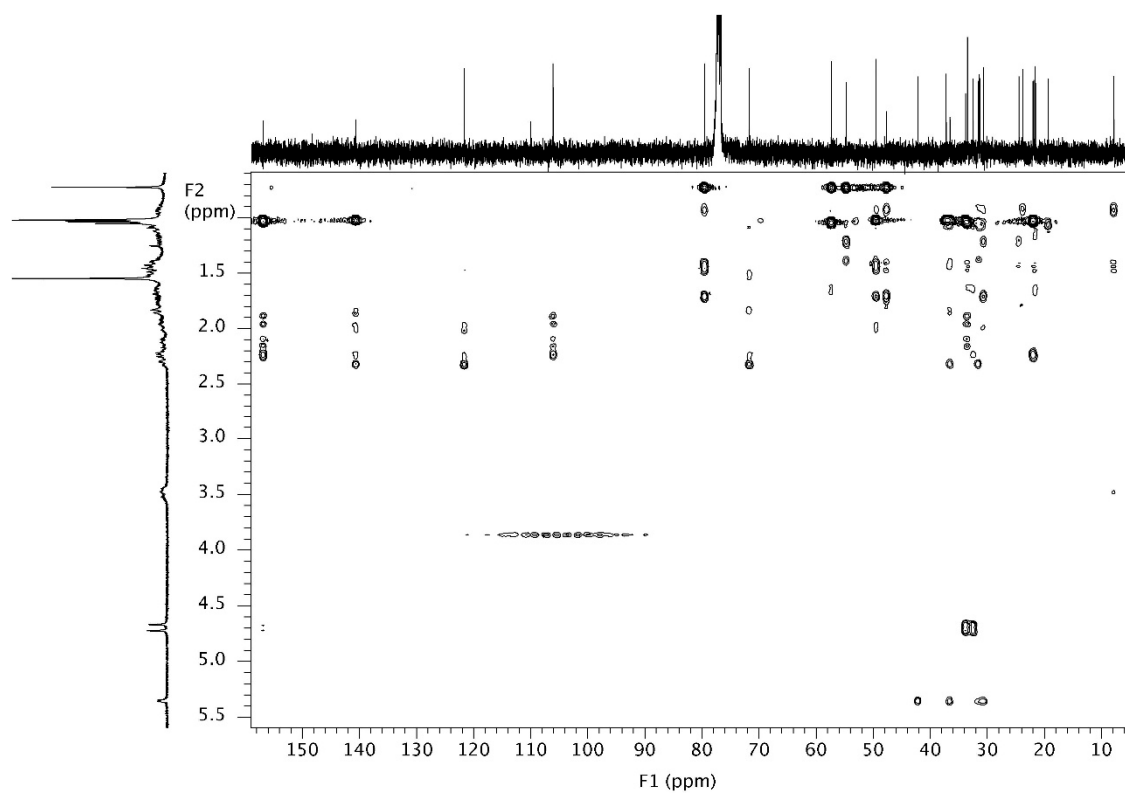

S13. gHMBC spectrum of compound **1** in  $\text{CDCl}_3$ .

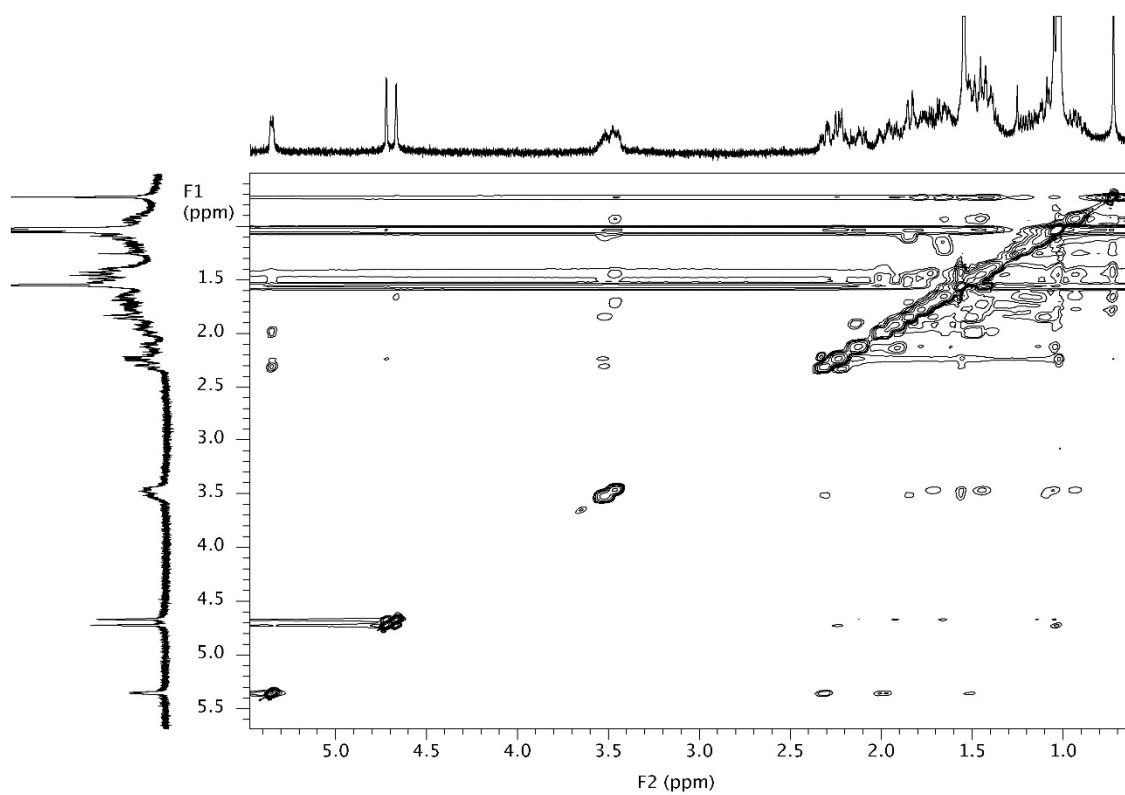

S14. NOESY spectrum of compound **1** in  $\text{CDCl}_3$ .



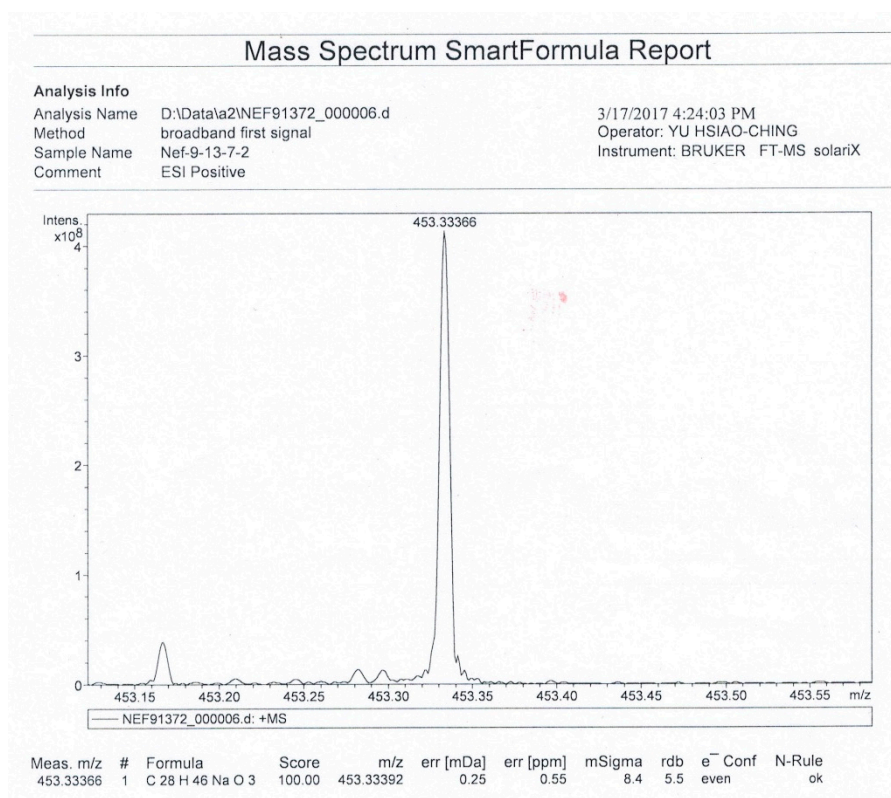

S15. HRESIMS spectrum of compound **2**.

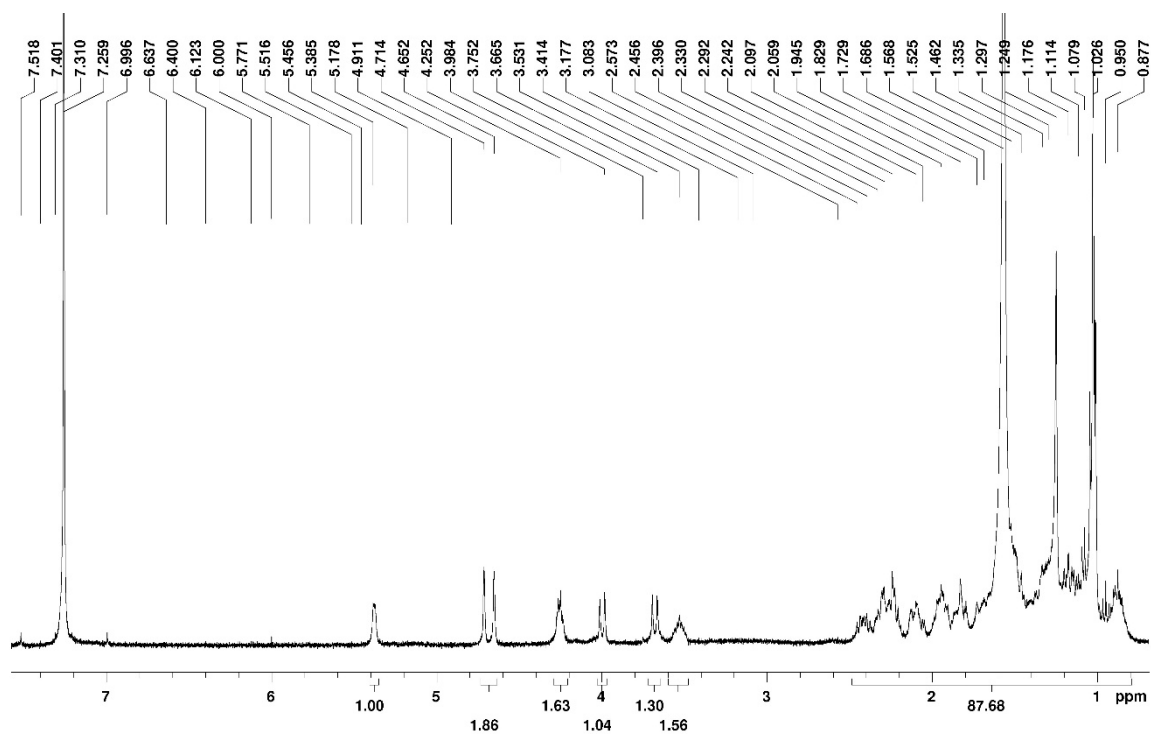

S16. <sup>1</sup>H NMR spectrum (400 MHz) of compound **2** in CDCl<sub>3</sub>.

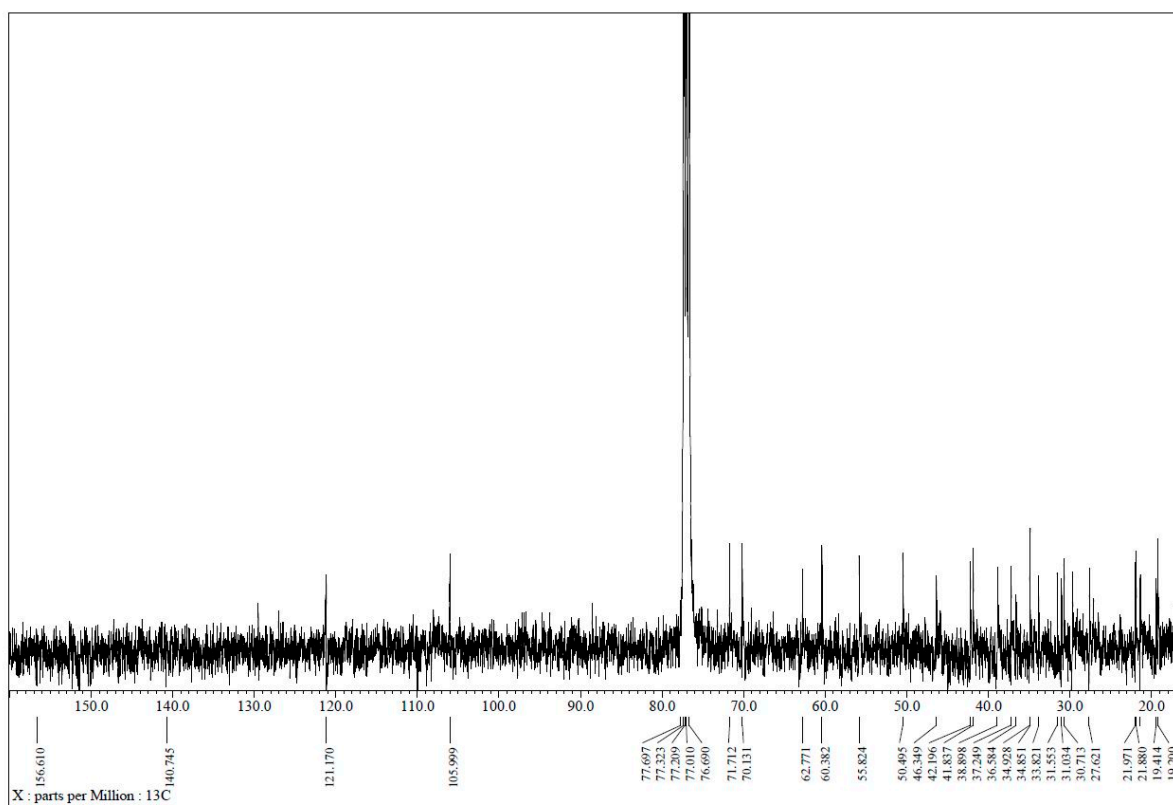

S17.  $^{13}\text{C}$  NMR spectrum (100 MHz) of compound **2** in  $\text{CDCl}_3$ .

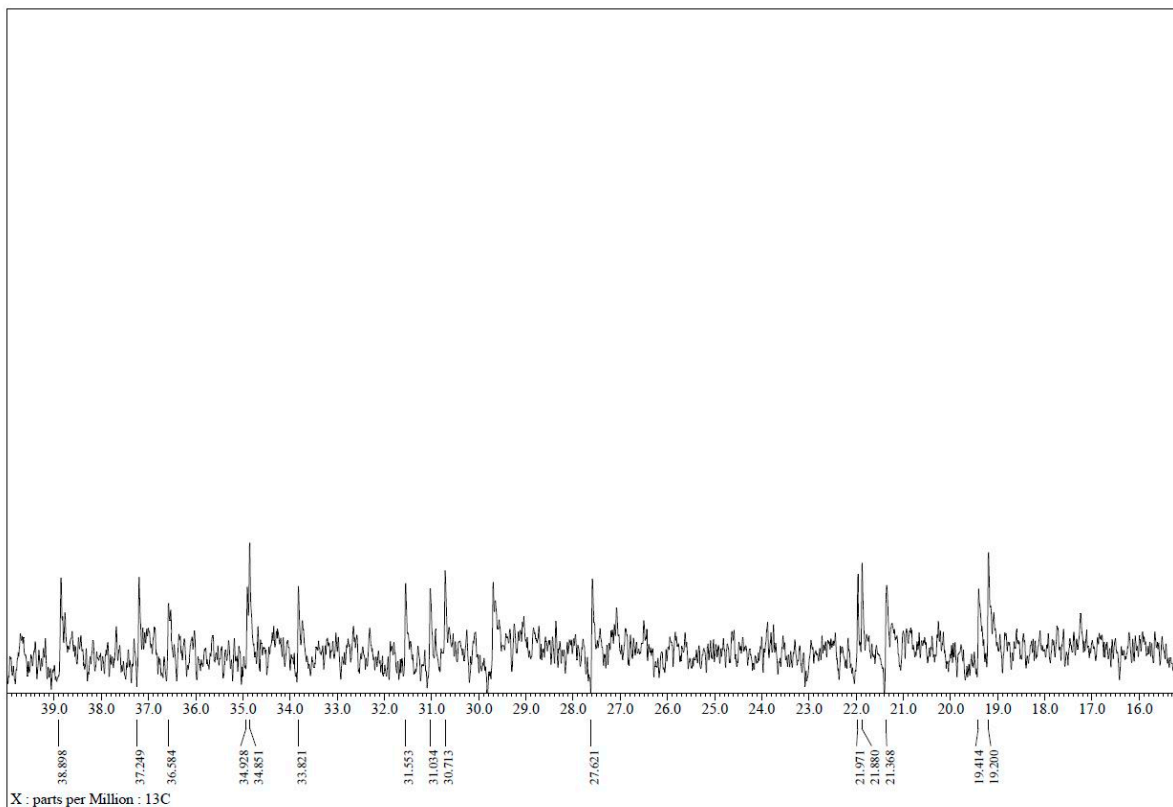

S18.  $^{13}\text{C}$  NMR (15–40 ppm) spectrum (100 MHz) of compound **2** in  $\text{CDCl}_3$ .

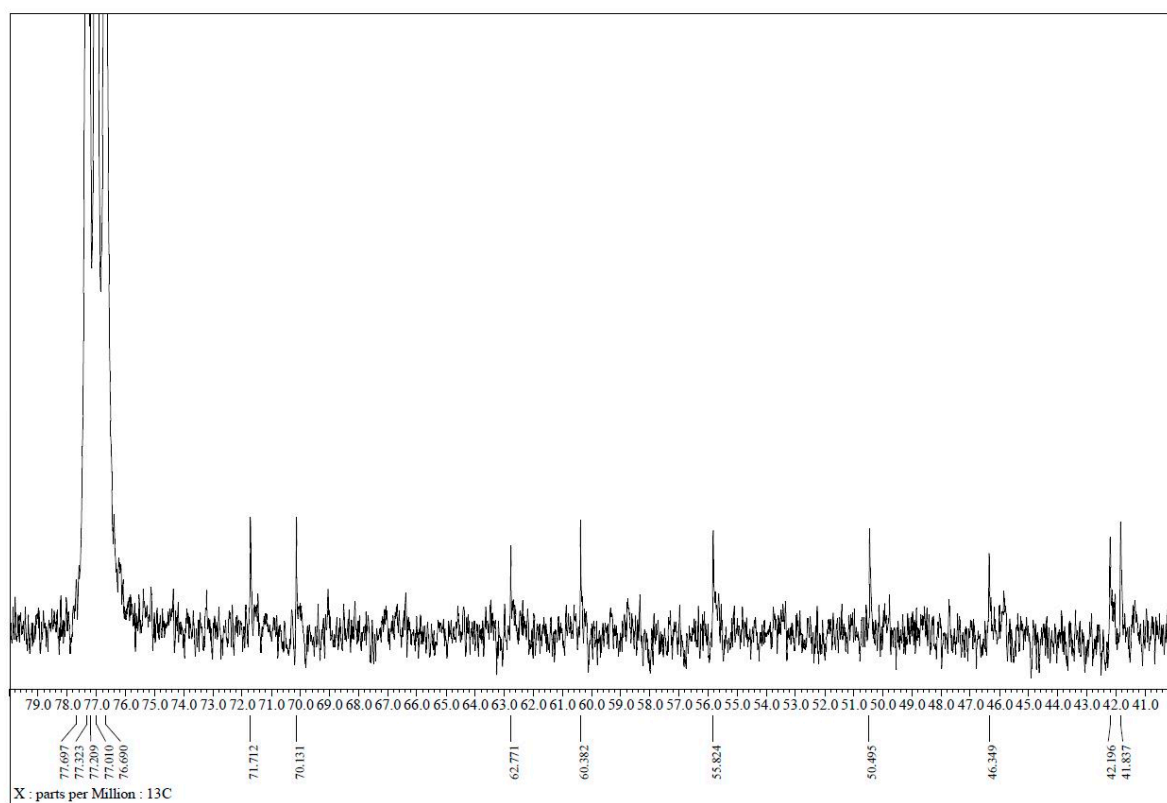

S19.  $^{13}\text{C}$  NMR (40–80 ppm) spectrum (100 MHz) of compound **2** in  $\text{CDCl}_3$ .

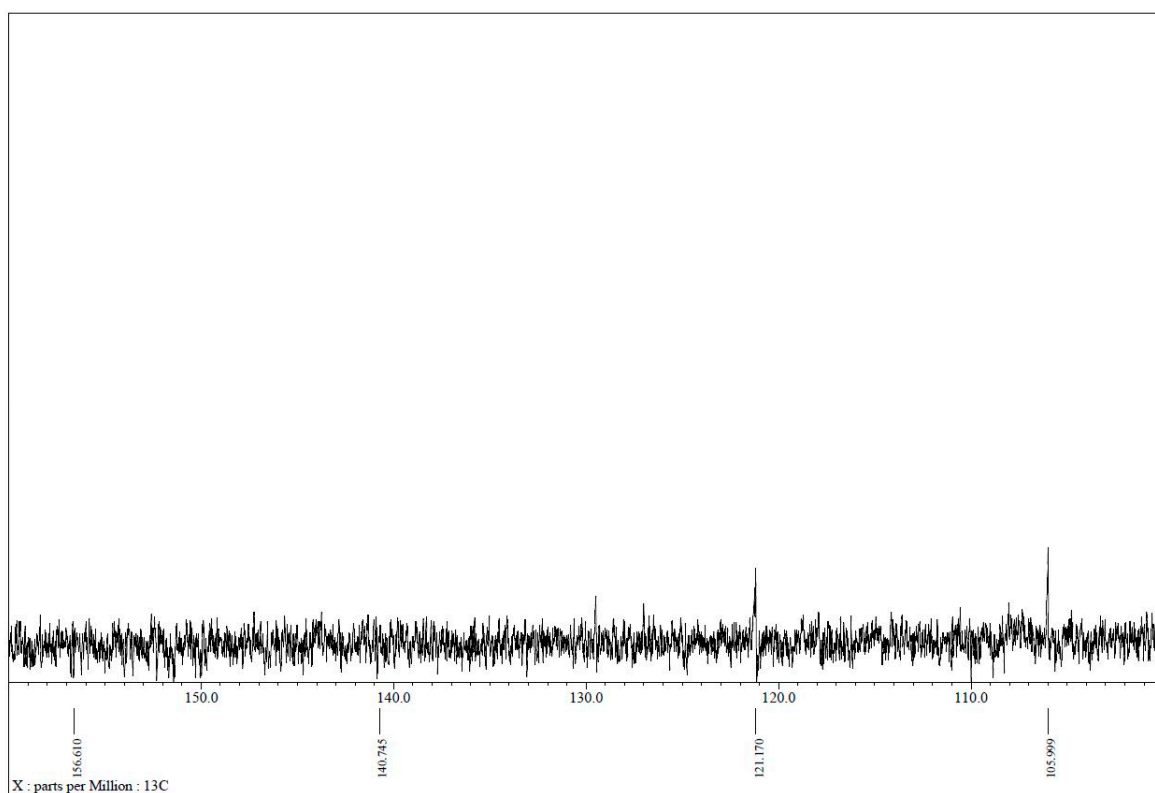

S20.  $^{13}\text{C}$  NMR (100–160 ppm) spectrum (100 MHz) of compound **2** in  $\text{CDCl}_3$ .

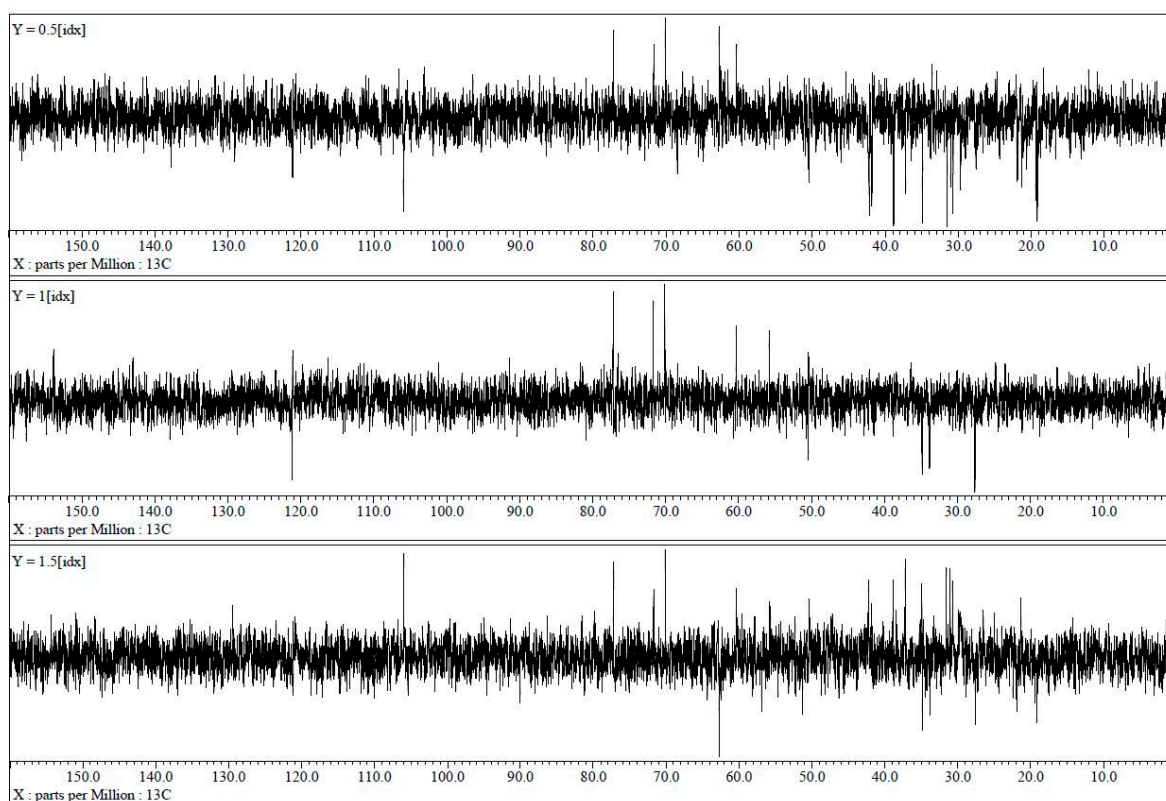

S21. DEPT spectrum of compound **2** in  $\text{CDCl}_3$ .

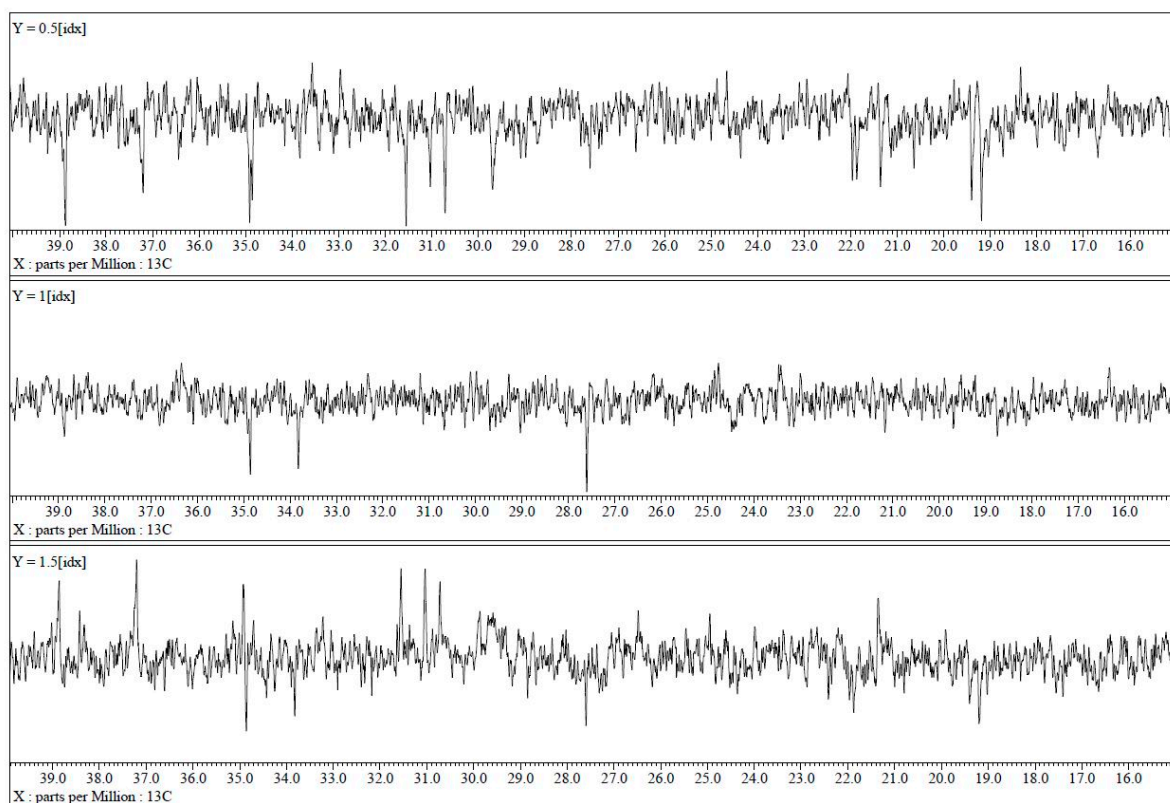

S22. DEPT (15–40 ppm) spectrum of compound **2** in  $\text{CDCl}_3$ .

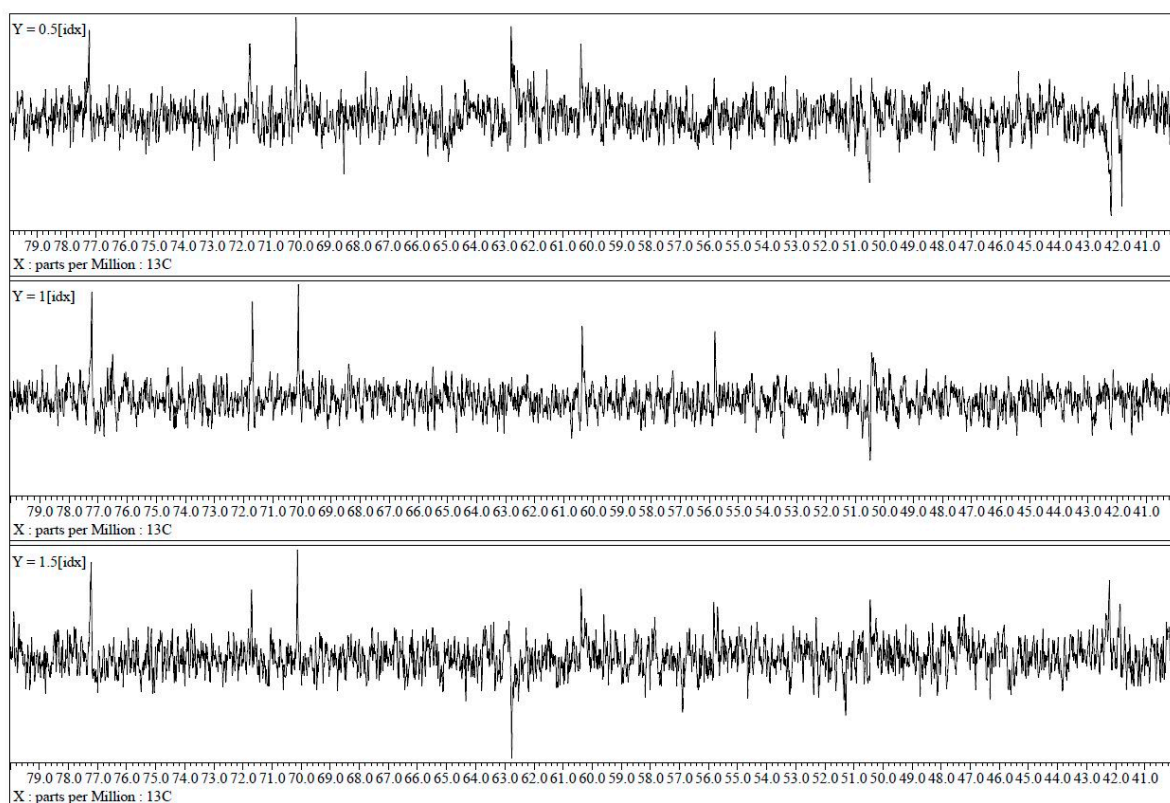

S23. DEPT (40–80 ppm) spectrum of compound **2** in CDCl<sub>3</sub>.

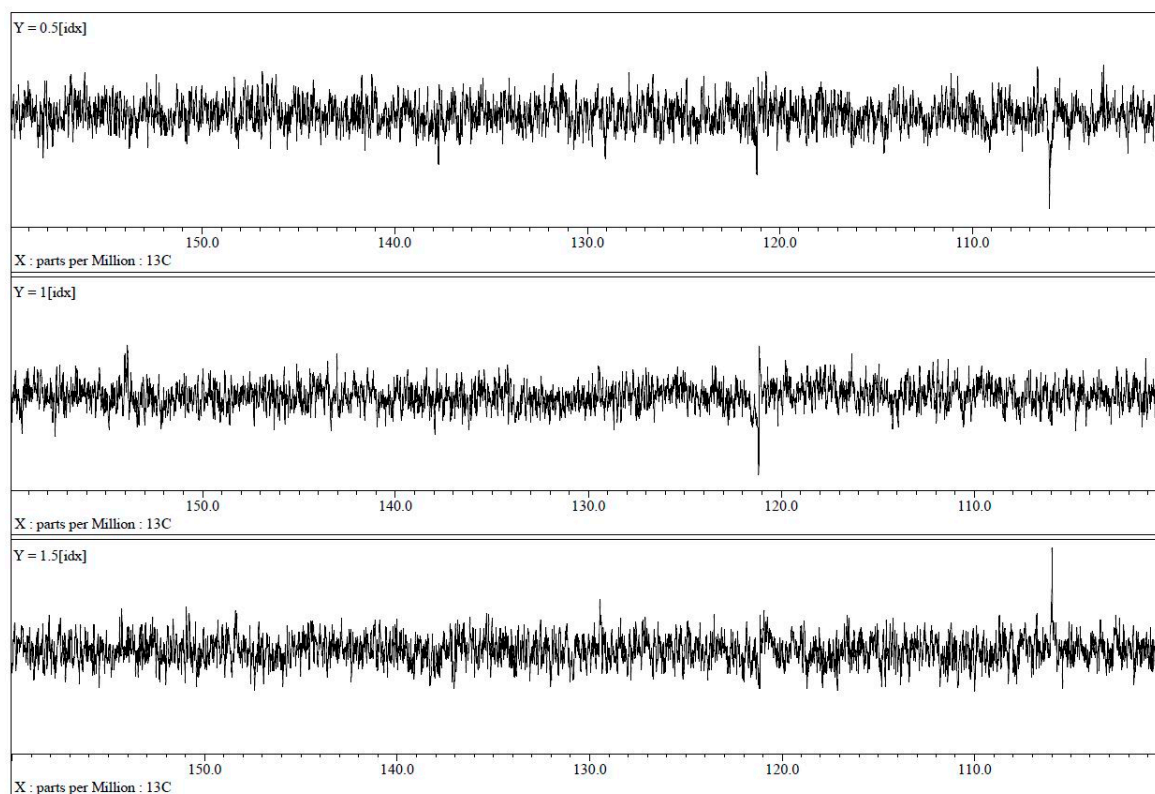

S24. DEPT (100–160 ppm) spectrum of compound **2** in CDCl<sub>3</sub>.



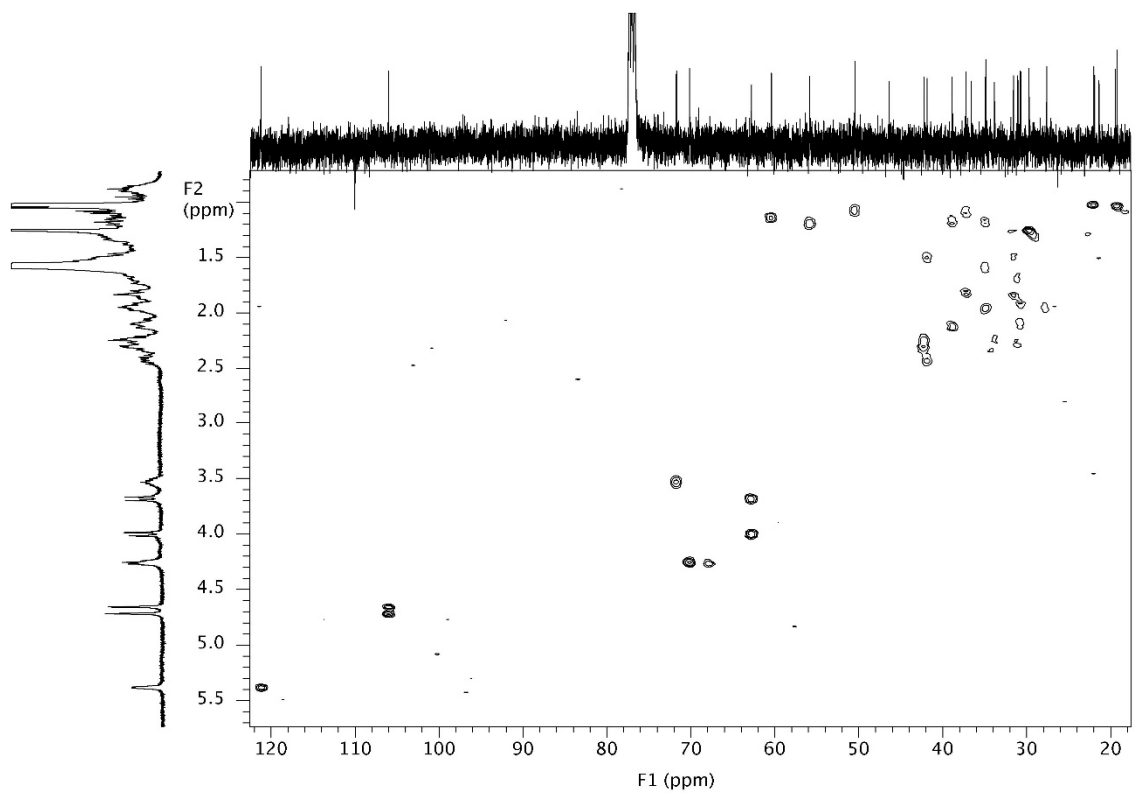

S25. gHSQC spectrum of compound **2** in CDCl<sub>3</sub>.

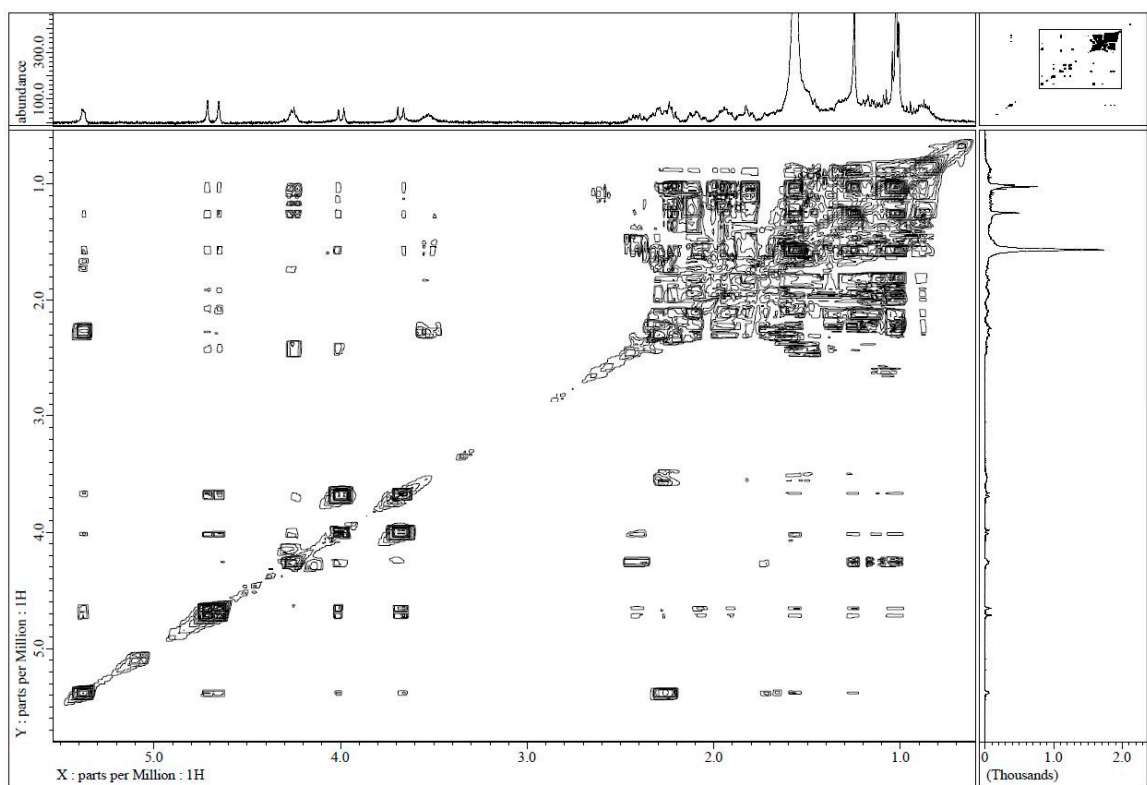

S26. <sup>1</sup>H–<sup>1</sup>H COSY spectrum of compound **2** in CDCl<sub>3</sub>.

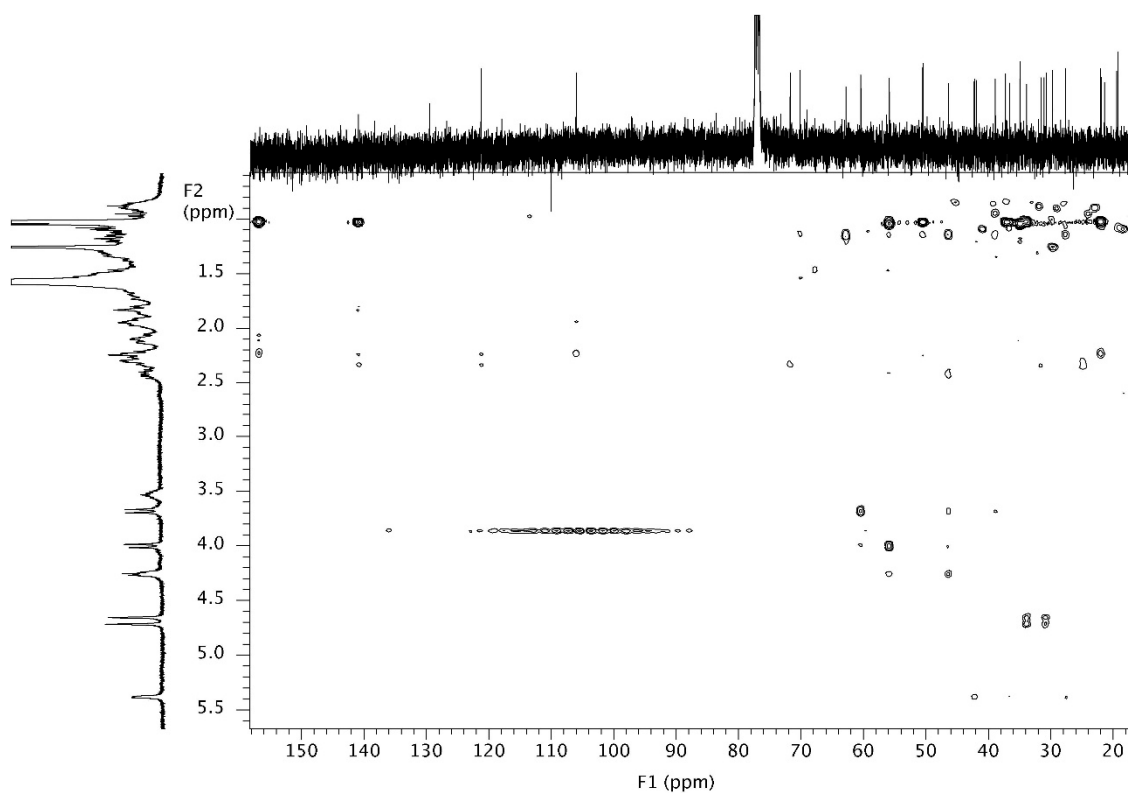

S27. gHMBC spectrum of compound **2** in  $\text{CDCl}_3$ .

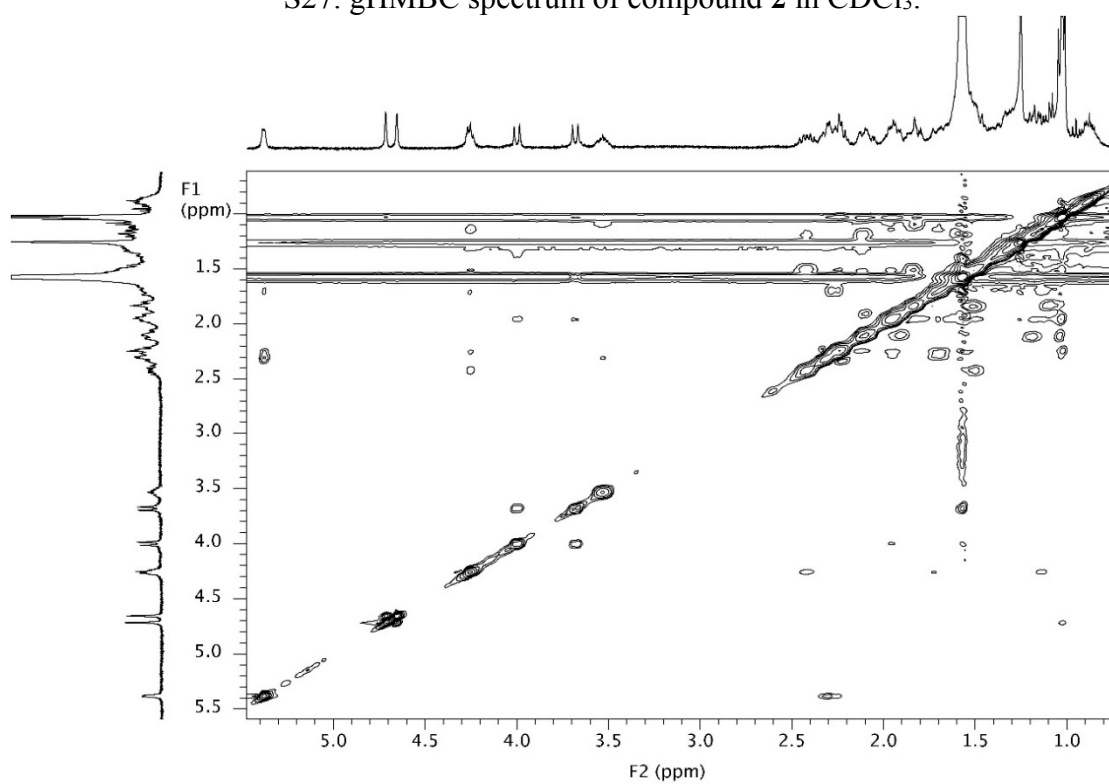

S28. NOESY spectrum of compound **2** in  $\text{CDCl}_3$ .
